# Supplementary material
Source: PubMed Central journal article supplement (PMC4623582)
Supplement: NIHMS730165-supplement-SM.pdf [file NIHMS730165-supplement-SM.pdf]

**Supplementary Table 1:** Pairwise comparison between depression and disease activity on quality of life in IBD patients (Mann-Whitney U test). The comparison is based on the four disease activity and depression categories (remission - no depression, remission - depression, active disease – no depression, active disease – depression) displayed in Figure 1. In total, there are six combinations of pairwise comparison out of four categories.

A. Crohn’s disease

| Comparison # | Disease Activity and Depression Status | SIBDQ Mean | # of Patients | Disease Activity and Depression Status | SIBDQ Mean |
|--------------|----------------------------------------|------------|---------------|----------------------------------------|------------|
| Comparison 1 | Remission with no depression           | 54.5       | 34            | Active disease with no depression      | 50.4       |
| Comparison 2 | Remission with depression              | 44.7       | 10            | Active disease with depression         | 39.0       |
| Comparison 3 | Active disease with no depression      | 50.4       | 5             | Active disease with depression         | 39.0       |
| Comparison 4 | Remission with no depression           | 54.5       | 34            | Remission with depression              | 44.7       |
| Comparison 5 | All non-depression patients            | 53.9       | 44            | All depression patients                | 42.6       |
| Comparison 6 | All remission patients                 | 52.2       | 39            | All active disease patients            | 44.2       |

B. Ulcerative Colitis

| Comparison # | Disease Activity and Depression Status | SIBDQ Mean | # of Patients | Disease Activity and Depression Status | SIBDQ Mean |
|--------------|----------------------------------------|------------|---------------|----------------------------------------|------------|
| Comparison 1 | Remission with no depression           | 58.9       | 13            | Active disease with no depression      | 47.1       |
| Comparison 2 | Remission with depression              | 40.3       | 3             | Active disease with depression         | 36.6       |
| Comparison 3 | Active disease with no depression      | 47.1       | 27            | Active disease with depression         | 36.6       |
| Comparison 4 | Remission with no depression           | 58.9       | 13            | Remission with depression              | 40.3       |
| Comparison 5 | All non-depression patients            | 50.9       | 40            | All depression patients                | 37.7       |
| Comparison 6 | All remission patients                 | 55.4       | 16            | All active disease patients            | 44.9       |

**Supplementary Table 2:** Regression analysis of the relationship between SIBDQ subphenotypes and BDI-II.

A. Crohn's disease

| Subphenotype | $\beta$ Coefficient | P value               |
|--------------|---------------------|-----------------------|
| Bowel        | -0.298              | $1.68 \times 10^{-5}$ |
| Systemic     | -0.202              | $9.95 \times 10^{-5}$ |
| Social       | -0.164              | 0.000507              |
| Emotional    | -0.144              | 0.00108               |
| All (SIBDQ)  | -0.808              | $2.10 \times 10^{-8}$ |

B. Ulcerative Colitis

| Subphenotype | $\beta$ Coefficient | P value               |
|--------------|---------------------|-----------------------|
| Bowel        | -0.232              | 0.00134               |
| Systemic     | -0.240              | $1.82 \times 10^{-7}$ |
| Social       | -0.171              | 0.00152               |
| Emotional    | -0.139              | $9.93 \times 10^{-4}$ |
| All (SIBDQ)  | -0.782              | $2.93 \times 10^{-6}$ |

**Supplementary Table 3:** Power calculation for various combinations of sample sizes and effect size measured in adjusted R-squares. The adjusted R-squares were calculated from simple regression with one predictor variable such as BDI, disease activity (CDAI in CD and SAI in UC), Narcotic use, etc. The predictor variables showing statistical significance were displayed in Table 3. The 0.01 type I error is used in power calculation. Sample sizes range from 50, 40, 15 which correspond to current CD or UC samples, CD remission or UC active samples, and CD active or UC remission samples. Additionally, the power for sample size 100 is listed.

| Adjusted R-squares | Power                     |                                        |                                        |             |
|--------------------|---------------------------|----------------------------------------|----------------------------------------|-------------|
|                    | 50 samples (CD or UC all) | 40 samples (CD remission or UC active) | 15 samples (CD active or UC remission) | 100 samples |
| <b>0.02</b>        | 0.113                     | 0.097                                  | 0.0545                                 | 0.173       |
| <b>0.04</b>        | 0.186                     | 0.152                                  | 0.0687                                 | 0.362       |
| <b>0.08</b>        | 0.358                     | 0.283                                  | 0.102                                  | 0.675       |
| <b>0.12</b>        | 0.533                     | 0.428                                  | 0.141                                  | 0.869       |
| <b>0.16</b>        | 0.688                     | 0.569                                  | 0.186                                  | 0.957       |
| <b>0.20</b>        | 0.808                     | 0.694                                  | 0.238                                  | 0.989       |
| <b>0.30</b>        | 0.961                     | 0.903                                  | 0.389                                  | 1.000       |
| <b>0.40</b>        | 0.996                     | 0.981                                  | 0.560                                  | 1.000       |
